# Supplementary material for: Detection of Somatic Mutations in Exome Sequencing of Tumor-only Samples
Source: PubMed Central journal article supplement (PMC5698426; doi:10.1038/s41598-017-14896-7), 2017-11-21
Supplement: 41598_2017_14896_MOESM1_ESM.pdf [file 41598_2017_14896_MOESM1_ESM.pdf]

## Supplementary Information

### Detection of Somatic Mutations in Exome Sequencing of Tumor-only Samples

Yu-Chin Hsu<sup>1</sup>, Yu-Ting Hsiao<sup>1</sup>, Jan-Gowth Chang<sup>2</sup> and Grace S. Shieh<sup>1,\*</sup>

<sup>1</sup>Institute of Statistical Science, Academia Sinica, Taipei 115, Taiwan, R.O.C.;

<sup>2</sup>Department of Laboratory Medicine, and Center of RNA Biology and Clinical Application, China Medical University Hospital, China Medical University, Taichung 404, Taiwan, R.O.C.

**Table S1. The list of cancer genes analyzed in the four cancers**

| Endometrial Cancer | Breast Cancer | Ovarian Cancer | Cutaneous Melanoma |
|--------------------|---------------|----------------|--------------------|
| ABCC6              | ABI1          | ABI1           | ABI1               |
| ABI1               | ABL1          | ABL1           | ABL1               |
| ABL1               | ABL2          | ABL2           | ABL2               |
| ABL2               | ACSL3         | ACSL3          | ACSL3              |
| AC083949.1         | ACSL6         | ACSL6          | ACSL6              |
| ACKR3              | ACVR1         | ACVR1          | ACVR1              |
| ACSL3              | AFF1          | AFF3           | AFF3               |
| ACSL6              | AFF3          | AFF4           | AFF4               |
| ACTA2              | AFF4          | AKAP9          | AKAP9              |
| AF001548.5         | AKAP9         | AKT1           | AKT1               |
| AF001548.6         | AKT1          | ALDH2          | AKT2               |
| AFF1               | AKT2          | ALK            | ALDH2              |
| AFF3               | ALDH2         | AMER1          | ALK                |
| AFF4               | ALK           | APC            | AMER1              |
| AIP                | AMER1         | ARHGAP26       | APC                |
| AKAP9              | APC           | ARHGEF12       | ARHGAP26           |
| AKT1               | ARHGAP26      | ARID1A         | ARHGEF12           |
| AKT2               | ARHGEF12      | ARID1B         | ARID1A             |
| AKT3               | ARID1A        | ARID2          | ARID1B             |
| AL133247.2         | ARID1B        | ASXL1          | ARID2              |
| AL161450.1         | ARID2         | ATF1           | ARNT               |
| ALDH2              | ARNT          | ATIC           | ASXL1              |
| ALK                | ASPCR1        | ATM            | ATIC               |
| AMER1              | ASXL1         | ATP1A1         | ATM                |
| ANKRD49            | ATF1          | ATP2B3         | ATP1A1             |
| AP000282.2         | ATM           | ATR            | ATP2B3             |
| AP000662.4         | ATP1A1        | ATRX           | ATR                |
| APC                | ATP2B3        | AXIN1          | ATRX               |
| AR                 | ATR           | AXIN2          | AXIN1              |
| ARHGAP26           | ATRX          | BAP1           | AXIN2              |
| ARHGEF12           | AXIN1         | BCL10          | BAP1               |
| ARID1A             | AXIN2         | BCL11A         | BCL10              |
| ARID1B             | BAP1          | BCL11B         | BCL11A             |
| ARID2              | BCL10         | BCL3           | BCL11B             |
| ARID3A             | BCL11A        | BCL6           | BCL2               |

|            |          |          |          |
|------------|----------|----------|----------|
| ARID3B     | BCL11B   | BCL7A    | BCL3     |
| ARID4A     | BCL2     | BCL9     | BCL6     |
| ARID4B     | BCL3     | BCOR     | BCL7A    |
| ARID5A     | BCL6     | BCR      | BCL9     |
| ARID5B     | BCL7A    | BIRC3    | BCOR     |
| ARNT       | BCL9     | BLM      | BCR      |
| ASPCR1     | BCOR     | BMPR1A   | BIRC3    |
| ASXL1      | BCR      | BRAF     | BLM      |
| ATF1       | BIRC3    | BRCA1    | BMPR1A   |
| ATIC       | BLM      | BRCA2    | BRAF     |
| ATM        | BMPR1A   | BRD4     | BRCA1    |
| ATR        | BRAF     | BRIP1    | BRCA2    |
| ATRX       | BRCA1    | BUB1B    | BRD3     |
| AURKA      | BRCA2    | C2orf44  | BRD4     |
| AVL9       | BRD3     | CACNA1D  | BRIP1    |
| AXIN2      | BRD4     | CALR     | BTG1     |
| BAP1       | BRIP1    | CAMTA1   | BUB1B    |
| BCL10      | BUB1B    | CANT1    | C2orf44  |
| BCL11A     | C2orf44  | CARD11   | CACNA1D  |
| BCL11B     | CACNA1D  | CARS     | CALR     |
| BCL2       | CALR     | CASC5    | CAMTA1   |
| BCL3       | CAMTA1   | CASP8    | CANT1    |
| BCL6       | CANT1    | CBL      | CARD11   |
| BCL7A      | CARD11   | CBLB     | CARS     |
| BCL9       | CARS     | CBLC     | CASC5    |
| BCOR       | CASC5    | CCDC6    | CASP8    |
| BCR        | CASP8    | CCNB1IP1 | CBFA2T3  |
| BIRC3      | CBFA2T3  | CD274    | CBL      |
| BIVM       | CBFB     | CD74     | CBLB     |
| BIVM-ERCC5 | CBL      | CD79A    | CBLC     |
| BLM        | CBLB     | CDC73    | CCDC6    |
| BMPR1A     | CBLC     | CDH1     | CCNB1IP1 |
| BRAF       | CCDC6    | CDH11    | CCND1    |
| BRCA1      | CCNB1IP1 | CDK12    | CCND2    |
| BRCA2      | CCND2    | CDK4     | CCND3    |
| BRD3       | CCND3    | CDK6     | CCNE1    |
| BRD4       | CCNE1    | CDKN1B   | CD274    |
| BRIP1      | CD274    | CDKN2A   | CD74     |
| BTG1       | CD74     | CDKN2C   | CD79A    |
| BUB1B      | CD79A    | CEP89    | CD79B    |
| C11orf65   | CD79B    | CHEK2    | CDC73    |
| C1orf147   | CDC73    | CHN1     | CDH1     |
| C4orf36    | CDH1     | CIC      | CDH11    |
| CANT1      | CDH11    | CLIP1    | CDK12    |
| CARD11     | CDK12    | CLP1     | CDK4     |
| CARS       | CDK4     | CLTC     | CDK6     |
| CARS-AS1   | CDK6     | CLTCL1   | CDKN1B   |

|            |         |         |         |
|------------|---------|---------|---------|
| CASC5      | CDKN1B  | CNOT3   | CDKN2A  |
| CBFA2T3    | CDKN2A  | CNTRL   | CDKN2C  |
| CBFB       | CDKN2C  | COL1A1  | CDX2    |
| CBL        | CDX2    | COL2A1  | CEBPA   |
| CBLB       | CEBPA   | CREB3L1 | CEP89   |
| CBLC       | CEP89   | CREB3L2 | CHCHD7  |
| CBR4       | CHCHD7  | CREBBP  | CHEK2   |
| CCDC140    | CHEK2   | CRTC1   | CHIC2   |
| CCDC6      | CHIC2   | CRTC3   | CHN1    |
| CCNB1IP1   | CHN1    | CSF3R   | CIC     |
| CCND1      | CIC     | CTNNB1  | CLIP1   |
| CCND2      | CLIP1   | CUX1    | CLP1    |
| CCND2-AS1  | CLP1    | CYLD    | CLTCL1  |
| CCND2-AS2  | CLTC    | DAXX    | CNBP    |
| CCND3      | CLTCL1  | DCTN1   | CNOT3   |
| CCNE1      | CNOT3   | DDB2    | CNTRL   |
| CD274      | COL1A1  | DDIT3   | COL1A1  |
| CD3EAP     | COL2A1  | DDX5    | COL2A1  |
| CD74       | COX6C   | DDX6    | COX6C   |
| CD79A      | CREB1   | DEK     | CREB3L1 |
| CD79B      | CREB3L1 | DICER1  | CREB3L2 |
| CDC42SE1   | CREB3L2 | DNM2    | CREBBP  |
| CDC73      | CREBBP  | DNMT3A  | CRLF2   |
| CDH1       | CRLF2   | EBF1    | CRTC1   |
| CDH11      | CRTC1   | ECT2L   | CRTC3   |
| CDH6       | CRTC3   | EGFR    | CSF3R   |
| CDK12      | CSF3R   | EIF3E   | CTNNB1  |
| CDK2AP2    | CTNNB1  | EIF4A2  | CUX1    |
| CDK4       | CUX1    | ELF4    | CYLD    |
| CDK6       | CYLD    | ELL     | DAXX    |
| CDK8       | DAXX    | ELN     | DCTN1   |
| CDKN1A     | DCTN1   | EML4    | DDB2    |
| CDKN1B     | DDB2    | EP300   | DDIT3   |
| CDKN2A     | DDIT3   | EPS15   | DDX10   |
| CDKN2B     | DDX10   | ERBB2   | DDX5    |
| CDKN2B-AS1 | DDX5    | ERBB3   | DDX6    |
| CDKN2C     | DDX6    | ERC1    | DEK     |
| CDKN2D     | DEK     | ERCC2   | DICER1  |
| CDX2       | DICER1  | ERCC3   | DNM2    |
| CDYL       | DNM2    | ERCC4   | DNMT3A  |
| CENPP      | DNMT3A  | ERCC5   | EBF1    |
| CEP128     | EBF1    | ERG     | ECT2L   |
| CERS2      | ECT2L   | ESR1    | EGFR    |
| CHCHD7     | EGFR    | ETNK1   | EIF3E   |
| CHD5       | EIF3E   | ETV1    | EIF4A2  |
| CHD6       | EIF4A2  | ETV4    | ELF4    |
| CHEK1      | ELF4    | ETV5    | ELK4    |

|                |         |          |         |
|----------------|---------|----------|---------|
| CHEK2          | ELK4    | ETV6     | ELL     |
| CHIC2          | ELL     | EWSR1    | ELN     |
| CHN1           | ELN     | EXT1     | EML4    |
| CHRNA10        | EML4    | EZR      | EP300   |
| CHURC1-FNTB    | EP300   | FAM131B  | EPS15   |
| CIC            | EPS15   | FAM46C   | ERBB2   |
| CIITA          | ERBB2   | FANCA    | ERBB3   |
| CLP1           | ERBB3   | FANCD2   | ERC1    |
| CLTC           | ERC1    | FANCE    | ERCC3   |
| CLTCL1         | ERCC3   | FANCF    | ERCC4   |
| CMC4           | ERCC4   | FANCG    | ERCC5   |
| CNBP           | ERCC5   | FBXO11   | ERG     |
| CNTRL          | ESR1    | FBXW7    | ESR1    |
| COL1A1         | ETV1    | FCRL4    | ETNK1   |
| COX6C          | ETV5    | FGFR1    | ETV1    |
| CREB1          | ETV6    | FGFR2    | ETV5    |
| CREB3L1        | EWSR1   | FGFR3    | ETV6    |
| CREB3L2        | EXT1    | FGFR4    | EWSR1   |
| CREBBP         | EXT2    | FH       | EXT1    |
| CRKL           | EZH2    | FIP1L1   | EXT2    |
| CRLF2          | EZR     | FLCN     | EZH2    |
| CRTC1          | FAM131B | FLI1     | EZR     |
| CRTC3          | FAM46C  | FLT3     | FAM131B |
| CSF1R          | FANCA   | FLT4     | FAM46C  |
| CTB-4E7.1      | FANCD2  | FOXA1    | FANCA   |
| CTB-51J22.1    | FANCE   | FOXO1    | FANCD2  |
| CTB-58E17.3    | FANCF   | FOXO3    | FANCE   |
| CTB-58E17.9    | FANCG   | FOXO4    | FANCF   |
| CTC-215O4.4    | FAS     | FOXP1    | FANCG   |
| CTC-554D6.1    | FBXO11  | FUS      | FAS     |
| CTD-2135D7.2   | FBXW7   | GATA1    | FBXO11  |
| CTD-2196E14.3  | FCRL4   | GATA2    | FBXW7   |
| CTD-2196E14.5  | FEV     | GATA3    | FCRL4   |
| CTD-2207P18.1  | FGFR1   | GMPS     | FGFR1   |
| CTD-2267D19.2  | FGFR2   | GNA11    | FGFR2   |
| CTD-2301A4.5   | FGFR3   | GNAQ     | FGFR3   |
| CTD-2339L15.3  | FGFR4   | GNAS     | FGFR4   |
| CTD-2517M22.17 | FH      | GOLGA5   | FH      |
| CTD-2525I3.3   | FHIT    | GOPC     | FHIT    |
| CTD-2535L24.2  | FLCN    | GPC3     | FIP1L1  |
| CTD-2561B21.3  | FLI1    | GPHN     | FLCN    |
| CTD-2561B21.4  | FLT3    | GRIN2A   | FLI1    |
| CTD-3037G24.3  | FLT4    | H3F3B    | FLT3    |
| CTD-3065B20.3  | FNBP1   | HIP1     | FLT4    |
| CTD-3185P2.1   | FOXA1   | HIST1H3B | FNBP1   |
| CTD-3214H19.4  | FOXL2   | HLA-A    | FOXA1   |
| CTNNB1         | FOXO4   | HLF      | FOXL2   |

|            |           |           |           |
|------------|-----------|-----------|-----------|
| CYLD       | FOXP1     | HNF1A     | FOXO1     |
| CYP1B1     | FUS       | HNRNPA2B1 | FOXO3     |
| CYP1B1-AS1 | GAS7      | HOOK3     | FOXO4     |
| DAXX       | GATA1     | HOXA11    | FOXP1     |
| DCBLD1     | GATA2     | HOXA13    | FUS       |
| DDB2       | GATA3     | HSP90AA1  | GAS7      |
| DDIT3      | GMPS      | IDH1      | GATA1     |
| DDX10      | GNA11     | IDH2      | GATA2     |
| DDX5       | GNAQ      | IKBKB     | GATA3     |
| DDX6       | GNAS      | IL21R     | GMPS      |
| DDX60L     | GOPC      | IL6ST     | GNA11     |
| DECR1      | GPC3      | IL7R      | GNAQ      |
| DEK        | GRIN2A    | IRF4      | GNAS      |
| DGKG       | H3F3A     | ITK       | GOPC      |
| DHX8       | H3F3B     | JAK1      | GPC3      |
| DICER1     | HERPUD1   | JAK2      | GRIN2A    |
| DICER1-AS1 | HEY1      | JAK3      | H3F3A     |
| DNMT3A     | HIP1      | KAT6B     | H3F3B     |
| EBF1       | HIST1H3B  | KCNJ5     | HERPUD1   |
| EGFR       | HLA-A     | KDM5A     | HEY1      |
| EGFR-AS1   | HNF1A     | KDM5C     | HIP1      |
| EIF4A2     | HNRNPA2B1 | KDM6A     | HIST1H3B  |
| ELAC1      | HOOK3     | KDR       | HLA-A     |
| ELAC2      | HOXA11    | KIAA1598  | HMGA2     |
| ELF4       | HOXA13    | KIF5B     | HNF1A     |
| ELK4       | HOXA9     | KIT       | HNRNPA2B1 |
| ELL        | HOXC13    | KLK2      | HOOK3     |
| ELN        | HOXD13    | KMT2A     | HOXA11    |
| EML4       | HRAS      | KMT2C     | HOXA13    |
| EP300      | HSP90AA1  | KMT2D     | HOXA9     |
| EPCAM      | HSP90AB1  | KRAS      | HOXD13    |
| EPHA10     | IDH1      | KTN1      | HRAS      |
| EPHA3      | IDH2      | LASP1     | HSP90AA1  |
| EPHA5      | IKBKB     | LCK       | HSP90AB1  |
| EPHA6      | IL2       | LCP1      | IDH1      |
| EPHB6      | IL21R     | LHFP      | IDH2      |
| EPS15      | IL6ST     | LIFR      | IKBKB     |
| ERBB2      | IL7R      | LMNA      | IKZF1     |
| ERBB3      | ITK       | LPP       | IL2       |
| ERBB4      | JAK1      | LRIG3     | IL6ST     |
| ERC1       | JAK2      | LSM14A    | IL7R      |
| ERCC1      | JAK3      | MAF       | ITK       |
| ERCC2      | JUN       | MALAT1    | JAK1      |
| ERCC3      | KAT6B     | MALT1     | JAK2      |
| ERCC4      | KCNJ5     | MAML2     | JAK3      |
| ERCC5      | KDM5A     | MAP2K1    | JAZF1     |
| ERG        | KDM5C     | MAP2K2    | JUN       |

|          |          |         |          |
|----------|----------|---------|----------|
| ETV1     | KDM6A    | MAP2K4  | KAT6B    |
| ETV4     | KDR      | MAP3K13 | KCNJ5    |
| ETV5     | KIAA1598 | MDM2    | KDM5A    |
| ETV5-AS1 | KIF5B    | MDM4    | KDM5C    |
| ETV6     | KIT      | MDS2    | KDM6A    |
| EWSR1    | KLF4     | MECOM   | KDR      |
| EXT1     | KLF6     | MED12   | KDSR     |
| EXT2     | KLK2     | MEN1    | KIAA1598 |
| EZH2     | KMT2A    | MET     | KIF5B    |
| FAM46C   | KMT2C    | MITF    | KIT      |
| FAM71B   | KMT2D    | MKL1    | KLF4     |
| FANCA    | KRAS     | MLH1    | KLF6     |
| FANCC    | KTN1     | MLLT3   | KLK2     |
| FANCD2   | LASP1    | MLLT4   | KMT2A    |
| FANCD2OS | LCK      | MN1     | KMT2C    |
| FANCE    | LCP1     | MPL     | KMT2D    |
| FANCG    | LHFP     | MSH2    | KRAS     |
| FAS      | LIFR     | MSH6    | LASP1    |
| FBXO11   | LMNA     | MSI2    | LCK      |
| FBXW7    | LMO1     | MSN     | LCP1     |
| FCGR2B   | LMO2     | MUC1    | LHFP     |
| FCGR2C   | LPP      | MUTYH   | LIFR     |
| FCGR3A   | LRIG3    | MYB     | LMNA     |
| FCRL4    | LSM14A   | MYC     | LMO1     |
| FEV      | LYL1     | MYCN    | LMO2     |
| FGF23    | MAML2    | MYD88   | LRIG3    |
| FGFR1    | MAP2K1   | MYH11   | LSM14A   |
| FGFR1OP  | MAP2K2   | MYH9    | LYL1     |
| FGFR2    | MAP2K4   | MYO5A   | MAF      |
| FGFR3    | MAP3K13  | MYOD1   | MAFB     |
| FGFR4    | MAX      | NAB2    | MAML2    |
| FH       | MDM2     | NACA    | MAP2K1   |
| FHIT     | MDM4     | NBN     | MAP2K2   |
| FHL1     | MDS2     | NCKIPSD | MAP2K4   |
| FIP1L1   | MECOM    | NCOA1   | MAP3K13  |
| FKBP1B   | MED12    | NCOA2   | MAX      |
| FKBP9    | MEN1     | NCOR1   | MDM2     |
| FLCN     | MET      | NDRG1   | MDM4     |
| FLI1     | MITF     | NF1     | MECOM    |
| FLT1     | MKL1     | NF2     | MED12    |
| FLT3     | MLH1     | NFATC2  | MEN1     |
| FLT4     | MLLT1    | NIN     | MET      |
| FNBP1    | MLLT3    | NONO    | MITF     |
| FNTB     | MLLT4    | NOTCH1  | MKL1     |
| FOLR1    | MN1      | NOTCH2  | MLH1     |
| FOXO1    | MNX1     | NPM1    | MLLT1    |
| FOXO3    | MPL      | NRAS    | MLLT10   |

|           |         |          |         |
|-----------|---------|----------|---------|
| FOXO4     | MSH2    | NRG1     | MLLT3   |
| FOXP1     | MSH6    | NSD1     | MLLT4   |
| FOXP1-AS1 | MSN     | NTRK1    | MN1     |
| FSTL3     | MTCP1   | NTRK3    | MNX1    |
| FUBP1     | MUC1    | NUMA1    | MPL     |
| FUS       | MUTYH   | NUP214   | MSH2    |
| GALNT3    | MYB     | NUP98    | MSH6    |
| GAS7      | MYC     | NUTM1    | MSN     |
| GATA1     | MYCN    | NUTM2A   | MTCP1   |
| GATA2     | MYD88   | NUTM2B   | MUC1    |
| GATA3     | MYH11   | OLIG2    | MUTYH   |
| GBGT1     | MYH9    | OMD      | MYB     |
| GGPS1     | MYO5A   | PALB2    | MYC     |
| GLMN      | MYOD1   | PAX3     | MYCL    |
| GMDS-AS1  | NAB2    | PAX5     | MYCN    |
| GMPS      | NACA    | PAX7     | MYD88   |
| GNA11     | NBN     | PAX8     | MYH11   |
| GNAQ      | NCKIPSD | PBRM1    | MYH9    |
| GNAS      | NCOA1   | PCM1     | MYO5A   |
| GNAS-AS1  | NCOA2   | PCSK7    | MYOD1   |
| GNL3      | NCOR1   | PDCD1LG2 | NAB2    |
| GOLGA4    | NDRG1   | PDE4DIP  | NACA    |
| GOLGA5    | NF1     | PDGFRA   | NBN     |
| GOPC      | NF2     | PDGFRB   | NCKIPSD |
| GP1BB     | NFATC2  | PER1     | NCOA1   |
| GPC3      | NFE2L2  | PHF6     | NCOA2   |
| GPHN      | NFIB    | PHOX2B   | NCOR1   |
| GSTM1     | NFKB2   | PICALM   | NDRG1   |
| GSTM2     | NFKBIE  | PIK3CA   | NF1     |
| GUCY1A2   | NIN     | PIK3R1   | NF2     |
| HDGF      | NONO    | PLCG1    | NFATC2  |
| HECW1     | NOTCH1  | PML      | NFE2L2  |
| HERPUD1   | NOTCH2  | PMS1     | NFIB    |
| HEY1      | NPM1    | PMS2     | NFKB2   |
| HIP1      | NRAS    | POLE     | NFKBIE  |
| HIST1H2BK | NRG1    | POT1     | NIN     |
| HLF       | NSD1    | POU2AF1  | NKX2-1  |
| HMGA1     | NT5C2   | POU5F1   | NONO    |
| HMGA2     | NTRK1   | PPARG    | NOTCH1  |
| HMGN2P46  | NTRK3   | PPFIBP1  | NOTCH2  |
| HNF1A     | NUMA1   | PPP2R1A  | NPM1    |
| HNF1A-AS1 | NUP214  | PPP6C    | NRAS    |
| HNRNPA2B1 | NUP98   | PRDM1    | NRG1    |
| HOOK3     | NUTM2A  | PRDM16   | NSD1    |
| HOTAIR    | NUTM2B  | PRF1     | NT5C2   |
| HOTTIP    | OLIG2   | PRRX1    | NTRK1   |
| HOXA10-AS | OMD     | PSIP1    | NTRK3   |

|           |          |          |          |
|-----------|----------|----------|----------|
| HOXA11    | P2RY8    | PTCH1    | NUMA1    |
| HOXA13    | PALB2    | PTEN     | NUP214   |
| HOXA9     | PAX3     | PTPN11   | NUP98    |
| HOXC11    | PAX5     | PTPRB    | NUTM1    |
| HOXC13    | PAX7     | PTPRC    | NUTM2A   |
| HOXC13-AS | PAX8     | PTPRK    | OLIG2    |
| HOXD10    | PBRM1    | PWWP2A   | OMD      |
| HOXD11    | PCM1     | RABEP1   | P2RY8    |
| HOXD13    | PCSK7    | RAD21    | PALB2    |
| HRAS      | PDCD1LG2 | RAD51B   | PAX3     |
| HSD17B3   | PDE4DIP  | RAF1     | PAX5     |
| HSD3B2    | PDGFB    | RALGDS   | PAX7     |
| HSP90AA1  | PDGFRA   | RANBP17  | PAX8     |
| HSP90AB1  | PDGFRB   | RANBP2   | PBRM1    |
| IDH1      | PER1     | RAP1GDS1 | PBX1     |
| IDH1-AS1  | PHF6     | RARA     | PCM1     |
| IDH2      | PHOX2B   | RB1      | PCSK7    |
| IGF1R     | PICALM   | RBM15    | PDCD1LG2 |
| IKBKE     | PIK3CA   | RECQL4   | PDE4DIP  |
| IKZF1     | PIK3R1   | REL      | PDGFB    |
| IL18BP    | PIM1     | RET      | PDGFRA   |
| IL2       | PLAG1    | RHOA     | PDGFRB   |
| IL21R     | PLCG1    | RHOH     | PER1     |
| IL21R-AS1 | PML      | RMI2     | PHF6     |
| IL6ST     | PMS1     | RNF213   | PHOX2B   |
| IL7R      | PMS2     | RNF43    | PICALM   |
| INSRR     | POLE     | ROS1     | PIK3CA   |
| IRF4      | POT1     | RPL10    | PIK3R1   |
| ITK       | POU2AF1  | RPL22    | PIM1     |
| JAK1      | POU5F1   | RPN1     | PLAG1    |
| JAK2      | PPARG    | RSPO2    | PLCG1    |
| JAK3      | PPFIBP1  | RUNDC2A  | PML      |
| JAZF1     | PPP2R1A  | RUNX1    | PMS1     |
| JAZF1-AS1 | PRCC     | RUNX1T1  | PMS2     |
| JUP       | PRDM1    | SBDS     | POLE     |
| KAT6A     | PRDM16   | SDHAF2   | POT1     |
| KAT6B     | PRF1     | SDHC     | POU2AF1  |
| KCNK12    | PRKAR1A  | SETBP1   | POU5F1   |
| KDM5A     | PSIP1    | SETD2    | PPARG    |
| KDM5C     | PTCH1    | SF3B1    | PPFIBP1  |
| KDM6A     | PTEN     | SFPQ     | PPP2R1A  |
| KDR       | PTPN11   | SH2B3    | PPP6C    |
| KDSR      | PTPRB    | SH3GL1   | PRCC     |
| KEAP1     | PTPRC    | SLC34A2  | PRDM1    |
| KIAA1549  | PTPRK    | SLC45A3  | PRDM16   |
| KIF1B     | PWWP2A   | SMAD4    | PRF1     |
| KIT       | RAC1     | SMARCA4  | PRKAR1A  |



|           |          |         |          |
|-----------|----------|---------|----------|
| KL        | RAD21    | SMARCB1 | PSIP1    |
| KLF6      | RAD51B   | SMARCD1 | PTCH1    |
| KLK2      | RAF1     | SMO     | PTEN     |
| KMT2A     | RALGDS   | SND1    | PTPN11   |
| KMT2C     | RANBP17  | SPECC1  | PTPRB    |
| KMT2D     | RANBP2   | SPEN    | PTPRC    |
| KRAS      | RAP1GDS1 | SPOP    | PTPRK    |
| KRT17     | RARA     | SRGAP3  | PWWP2A   |
| KRT18P62  | RB1      | SS18    | RAC1     |
| KTN1      | RECQL4   | SS18L1  | RAD21    |
| KTN1-AS1  | REL      | STAG2   | RAD51B   |
| LASP1     | RET      | STAT3   | RAF1     |
| LCK       | RHOA     | STAT5B  | RALGDS   |
| LCP1      | RHOH     | STAT6   | RANBP17  |
| LHFP      | RNF213   | STIL    | RANBP2   |
| LIFR      | RNF43    | STK11   | RAP1GDS1 |
| LIFR-AS1  | ROS1     | SUFU    | RARA     |
| LINC00094 | RPL10    | SUZ12   | RB1      |
| LMO1      | RPL22    | SYK     | RECQL4   |
| LMO2      | RPL5     | TBL1XR1 | REL      |
| LPP       | RPN1     | TBX3    | RET      |
| LPP-AS1   | RSPO2    | TCF12   | RHOA     |
| LPP-AS2   | RSPO3    | TCF3    | RHOH     |
| LRP5      | RUNDC2A  | TCF7L2  | RMI2     |
| LRRFIP2   | RUNX1    | TCL1A   | RNF213   |
| LSM3      | RUNX1T1  | TERT    | RNF43    |
| LTBP2     | SBDS     | TET1    | ROS1     |
| LTBP3     | SDC4     | TET2    | RPL10    |
| LYL1      | SDHAF2   | TFE3    | RPL22    |
| MAD2L1BP  | SDHB     | TFEB    | RPL5     |
| MAF       | SDHC     | TFPT    | RPN1     |
| MALT1     | SDHD     | TFRC    | RSPO2    |
| MAML2     | SEPT6    | THRAP3  | RSPO3    |
| MAP2K1    | SEPT9    | TNFAIP3 | RUNDC2A  |
| MAP2K2    | SET      | TOP1    | RUNX1    |
| MAP2K4    | SETBP1   | TP53    | RUNX1T1  |
| MAP3K1    | SETD2    | TPM3    | SBDS     |
| MAP3K8    | SF3B1    | TPR     | SDC4     |
| MAP3L1    | SFPQ     | TRAF7   | SDHAF2   |
| MARCH9    | SH2B3    | TRIM24  | SDHB     |
| MAX       | SH3GL1   | TRIM27  | SDHC     |
| MC1R      | SLC34A2  | TRIM33  | SDHD     |
| MCL1      | SLC45A3  | TRIP11  | SEPT6    |
| MDM2      | SMAD4    | TRRAP   | SEPT9    |
| MDM4      | SMARCA4  | TSC1    | SET      |
| MDS2      | SMARCB1  | TSC2    | SETBP1   |
| MECOM     | SMARCD1  | TSHR    | SETD2    |

|           |          |         |         |
|-----------|----------|---------|---------|
| MED12     | SMO      | TTL     | SF3B1   |
| MED7      | SND1     | UBR5    | SFPQ    |
| MEN1      | SOCS1    | VHL     | SH2B3   |
| MET       | SOX2     | VTI1A   | SH3GL1  |
| METTTL21A | SPECC1   | WAS     | SLC34A2 |
| MFSD11    | SPEN     | WHSC1   | SLC45A3 |
| MFSD2B    | SPOP     | WHSC1L1 | SMAD4   |
| MFSD4     | SRGAP3   | WIF1    | SMARCA4 |
| MITF      | SRSF2    | WRN     | SMARCB1 |
| MKL1      | SRSF3    | WT1     | SMARCD1 |
| MLF1      | SS18     | WWTR1   | SMO     |
| MLH1      | SSX1     | XPC     | SND1    |
| MLLT1     | STAG2    | XPO1    | SOCS1   |
| MLLT10    | STAT3    | YWHAE   | SOX2    |
| MLLT11    | STAT5B   | ZCCHC8  | SPEN    |
| MLLT3     | STAT6    | ZNF198  | SPOP    |
| MLLT4     | STIL     | ZNF278  | SRGAP3  |
| MLLT6     | STK11    | ZNF331  | SRSF2   |
| MN1       | STRN     | ZNF384  | SRSF3   |
| MNX1      | SUFU     | ZNF521  | SS18    |
| MNX1-AS2  | SUZ12    | ZRSR2   | SSX1    |
| MPL       | SYK      |         | STAG2   |
| MPRIP     | TAL1     |         | STAT3   |
| MRE11A    | TBL1XR1  |         | STAT5B  |
| MSH2      | TBX3     |         | STAT6   |
| MSH6      | TCEA1    |         | STIL    |
| MSI2      | TCF12    |         | STK11   |
| MSN       | TCF3     |         | STRN    |
| MTCP1     | TCF7L2   |         | SUFU    |
| MTOR      | TCL1A    |         | SUZ12   |
| MTOR-AS1  | TERT     |         | SYK     |
| MTUS2     | TET1     |         | TAL1    |
| MTUS2-AS1 | TET2     |         | TBL1XR1 |
| MUC1      | TFE3     |         | TBX3    |
| MUTYH     | TFEB     |         | TCEA1   |
| MYB       | TFPT     |         | TCF12   |
| MYB-AS1   | TFRC     |         | TCF3    |
| MYC       | THRAP3   |         | TCF7L2  |
| MYCL      | TLX1     |         | TCL1A   |
| MYCN      | TNFAIP3  |         | TCL6    |
| MYCNOS    | TNFRSF17 |         | TERT    |
| MYD88     | TOP1     |         | TET2    |
| MYH11     | TP53     |         | TFE3    |
| MYH9      | TPM3     |         | TFEB    |
| MYOC      | TPM4     |         | TFPT    |
| NACA      | TPR      |         | TFRC    |
| NBN       | TRAF7    |         | THRAP3  |

NCKIPSD  
NCOA1  
NCOA2  
NCOA4  
NDE1  
NDRG1  
NDUFA3  
NF1  
NF2  
NFE2L2  
NFIB  
NFKB2  
NIN  
NKX2-1  
NKX2-1-AS1  
NONO  
NOTCH1  
NOTCH2  
NOTCH3  
NOTCH4  
NPM1  
NR4A3  
NRAS  
NSD1  
NTRK1  
NTRK2  
NTRK3  
NTRK3-AS1  
NUMA1  
NUP214  
NUP88  
NUP98  
NUTM1  
NUTM2A  
NUTM2A-AS1  
NUTM2B  
OMD  
OPTN  
OSMR  
P2RY8  
PAFAH1B2  
PAK6  
PAK7  
PALB2  
PALLD  
PATZ1  
PAX2

TRIM24  
TRIM27  
TRIM33  
TRIP11  
TRRAP  
TSC1  
TSC2  
TSHR  
TTL  
U2AF1  
UBR5  
USP6  
VHL  
VTI1A  
WAS  
WHSC1  
WHSC1L1  
WIF1  
WRN  
WT1  
WWTR1  
XPA  
XPC  
XPO1  
ZCCHC8  
ZNF198  
ZNF278  
ZNF384  
ZNF521  
ZRSR2

TMPRSS2  
TNFAIP3  
TNFRSF17  
TOP1  
TP53  
TPM3  
TPR  
TRAF7  
TRIM24  
TRIM27  
TRIM33  
TRIP11  
TRRAP  
TSC1  
TSC2  
TSHR  
U2AF1  
UBR5  
USP6  
VHL  
VTI1A  
WAS  
WHSC1  
WHSC1L1  
WIF1  
WRN  
WT1  
WWTR1  
XPA  
XPC  
XPO1  
YWHAE  
ZBTB16  
ZCCHC8  
ZNF198  
ZNF278  
ZNF331  
ZNF384  
ZNF521  
ZRSR2

PAX3  
PAX5  
PAX6  
PAX7  
PAX8  
PAX8-AS1  
PBRM1  
PBX1  
PCM1  
PCSK7  
PDCD1LG2  
PDE4DIP  
PDGFB  
PDGFRA  
PDGFRB  
PDPK1  
PER1  
PGAP3  
PHF6  
PHOX2B  
PICALM  
PIK3CA  
PIK3R1  
PIM1  
PLAG1  
PLK1  
PML  
PMS1  
PMS2  
POU2AF1  
POU5F1  
PPARG  
PPP2R1A  
PRCC  
PRDM1  
PRDM16  
PRF1  
PRG4  
PRKAR1A  
PRKDC  
PRRX1  
PSIP1  
PTCH1  
PTEN  
PTK2  
PTK2B  
PTPN11

PTPRD  
PTRH2  
RABEP1  
RAD51B  
RAF1  
RALGDS  
RANBP17  
RAP1GDS1  
RARA  
RB1  
RBM15  
RBM34  
RCN1  
RECQL4  
REL  
RET  
RHOH  
RICTOR  
RMDN2  
RMI2  
RNASEL  
RNF170  
RNF207  
ROS1  
RP11-1070N10.6  
RP11-114N19.3  
RP11-1167A19.2  
RP11-119F19.2  
RP11-120M18.2  
RP11-126O1.4  
RP11-126O1.5  
RP11-131L23.1  
RP11-133K1.2  
RP11-143H17.1  
RP11-145E5.5  
RP11-148G20.1  
RP11-152K4.2  
RP11-162P23.2  
RP11-164H13.1  
RP11-166B2.1  
RP11-166D19.1  
RP11-169K16.9  
RP11-191G24.1  
RP11-201K10.3  
RP11-20I23.6  
RP11-20I23.8  
RP11-211G3.3

RP11-227F19.1  
RP11-23F23.2  
RP11-240L7.4  
RP11-242D8.1  
RP11-25K21.1  
RP11-25K21.6  
RP11-285E9.6  
RP11-286H14.8  
RP11-286N22.8  
RP11-286O18.1  
RP11-297B17.3  
RP11-298J23.5  
RP11-318A15.7  
RP11-31L23.3  
RP11-323J4.1  
RP11-327F22.1  
RP11-327F22.4  
RP11-350N15.4  
RP11-354M1.2  
RP11-355B11.2  
RP11-356I2.4  
RP11-359B12.2  
RP11-363L24.3  
RP11-366L20.2  
RP11-370K11.1  
RP11-374P20.4  
RP1-137K2.2  
RP11-380O24.1  
RP11-383G6.3  
RP11-387D10.2  
RP11-392O1.4  
RP11-39K24.2  
RP11-420A6.2  
RP11-434D12.1  
RP11-435O5.5  
RP11-45M22.4  
RP11-461L13.2  
RP11-475N22.4  
RP11-513D5.2  
RP11-513D5.5  
RP11-517A5.7  
RP11-517H2.6  
RP11-517O13.3  
RP11-519G16.3  
RP11-530I17.1  
RP11-544A12.4  
RP11-544A12.8

RP11-573D15.9  
RP11-57H14.2  
RP11-598P20.5  
RP11-599B13.6  
RP11-603J24.9  
RP11-619L19.1  
RP11-635L1.3  
RP11-64D24.2  
RP11-654A16.1  
RP11-654A16.3  
RP11-6B6.3  
RP1-170O19.20  
RP11-729L2.2  
RP11-72M17.1  
RP11-744N12.3  
RP11-770J1.3  
RP11-77G23.2  
RP11-794P6.2  
RP11-807H22.7  
RP11-830F9.5  
RP11-830F9.6  
RP11-840I19.3  
RP11-848P1.5  
RP11-849H4.4  
RP11-876N24.2  
RP11-896J10.3  
RP1-18D14.7  
RP11-936I5.1  
RP1-1J6.2  
RP1-309F20.3  
RP1-85F18.5  
RP1-85F18.6  
RP3-395M20.8  
RP3-400N23.6  
RP3-416J7.4  
RP4-761J14.8  
RP4-791M13.4  
RP4-791M13.5  
RP5-951N9.1  
RP5-951N9.2  
RPL21P122  
RPL22  
RPL6  
RPN1  
RPSAP52  
RPTOR  
RRM1

RUNX1  
RUNX1T1  
SARDH  
SBDS  
SDCCAG8  
SDHAF2  
SDHB  
SDHC  
SDHD  
SENCR  
SEPT5  
SEPT6  
SEPT9  
SET  
SETD2  
SETD5-AS1  
SETDB1  
SF3B1  
SF3B2  
SFPQ  
SH2D2A  
SH3GL1  
SLC22A23  
SLC30A4  
SLC45A3  
SMAD2  
SMAD3  
SMAD4  
SMARCA4  
SMARCB1  
SMIM4  
SMO  
SNAPC3  
SNAPC5  
SNX29  
SOCS1  
SOX2-OT  
SPECC1  
SPEN  
SRC  
SRD5A2  
SRGAP3  
SRGAP3-AS1  
SRSF3  
SS18  
SS18L1  
SSX1



SSX2  
SSX4  
STAMBPL1  
STAT3  
STIL  
STK11  
STX11  
STXBP2  
SUFU  
SUZ12  
SYK  
TAF15  
TAL1  
TAX1BP1  
TCEA1  
TCEA1P2  
TCF12  
TCF19  
TCF3  
TCF4  
TCF7L2  
TCL1A  
TCL6  
TERT  
TET1  
TET2  
TFE3  
TFEB  
TFG  
TFPT  
TFRC  
TGFB2  
THRAP3  
TLX1  
TLX3  
TMEM127  
TMPRSS2  
TNFAIP3  
TNFRSF14  
TNFRSF17  
TOE1  
TOP1  
TOP2A  
TP53  
TPM3  
TPM4  
TPR

TRIM24  
TRIM27  
TRIM33  
TRIP11  
TSC1  
TSC2  
TSHR  
TSPAN31  
TTL  
TYK2  
TYW1  
U2AF1  
ULK4  
UNC13D  
USP6  
UTY  
VHL  
VPS13B  
VTI1A  
WAS  
WDR36  
WHSC1  
WHSC1L1  
WIF1  
WRAP53  
WRN  
WT1  
XPA  
XPC  
XPO1  
YPEL4  
YWHAE  
ZBTB16  
ZMYM2  
ZNF232  
ZNF276  
ZNF280D  
ZNF331  
ZNF384  
ZNF521  
ZNF668  
ZRSR2

**Table S2A. The performances of the four algorithms in ten experiments, checked against the reported mutations in TCGA EC paper; GATKcan used the cutoffs trained by ten randomly sampled EC tumors in each repeat.**

| Repeat                  | 1                      | 2      | 3      | 4      | 5      | 6      | 7      | 8      | 9      | 10     | Mean     | SE    |      |
|-------------------------|------------------------|--------|--------|--------|--------|--------|--------|--------|--------|--------|----------|-------|------|
| No. of called variants  | 62,025                 | 61,938 | 60,967 | 62,117 | 60,760 | 61,263 | 61,442 | 61,310 | 61,948 | 61,302 | 61,507.2 | 473.2 |      |
| No. of somatic variants | 2,067                  | 2,128  | 2,150  | 2,110  | 2,038  | 2,125  | 2,069  | 2,083  | 2,122  | 2,124  | 2,101.6  | 35.3  |      |
| GATK                    | TPR                    | 88.2%  | 88.3%  | 89.6%  | 88.2%  | 87.2%  | 88.0%  | 88.0%  | 88.0%  | 88.2%  | 88.0%    | 88.2% | 0.6% |
|                         | cFPR                   | 65.1%  | 65.1%  | 65.4%  | 65.2%  | 65.2%  | 65.2%  | 64.9%  | 65.2%  | 65.1%  | 65.1%    | 65.2% | 0.1% |
|                         | precision              | 13.0%  | 13.0%  | 12.5%  | 12.9%  | 11.7%  | 12.5%  | 12.5%  | 12.6%  | 13.1%  | 12.6%    | 12.6% | 0.4% |
|                         | MCC                    | 14.7%  | 14.8%  | 15.1%  | 14.6%  | 13.4%  | 14.3%  | 14.4%  | 14.4%  | 14.7%  | 14.4%    | 14.5% | 0.4% |
|                         | TPR <sup>†</sup>       | 98.7%  | 98.8%  | 98.8%  | 98.8%  | 98.8%  | 98.8%  | 98.7%  | 98.7%  | 98.8%  | 98.8%    | 98.8% | 0.0% |
|                         | cFPR <sup>†</sup>      | 81.5%  | 81.1%  | 81.0%  | 80.5%  | 80.6%  | 80.4%  | 80.9%  | 81.0%  | 81.1%  | 81.4%    | 81.0% | 0.4% |
|                         | precision <sup>†</sup> | 54.3%  | 54.9%  | 54.9%  | 54.8%  | 54.1%  | 54.8%  | 54.5%  | 54.6%  | 55.1%  | 54.6%    | 54.7% | 0.3% |
|                         | MCC <sup>†</sup>       | 28.7%  | 29.3%  | 29.5%  | 29.9%  | 29.7%  | 29.9%  | 29.3%  | 29.3%  | 29.5%  | 29.0%    | 29.4% | 0.4% |
| GATKcan                 | TPR                    | 95.3%  | 95.2%  | 98.7%  | 94.9%  | 97.0%  | 98.3%  | 94.7%  | 98.5%  | 93.5%  | 94.7%    | 96.1% | 1.9% |
|                         | cFPR                   | 11.5%  | 11.4%  | 14.2%  | 10.8%  | 13.4%  | 14.2%  | 10.8%  | 14.0%  | 10.7%  | 10.8%    | 12.2% | 1.6% |
|                         | precision              | 47.9%  | 48.1%  | 42.0%  | 49.0%  | 41.9%  | 42.4%  | 48.1%  | 42.9%  | 49.3%  | 48.5%    | 46.0% | 3.2% |
|                         | MCC                    | 63.0%  | 63.1%  | 59.4%  | 63.8%  | 58.9%  | 59.6%  | 63.1%  | 60.0%  | 63.4%  | 63.4%    | 61.8% | 2.0% |
|                         | TPR <sup>†</sup>       | 98.1%  | 98.4%  | 99.4%  | 98.0%  | 98.9%  | 99.3%  | 98.0%  | 99.4%  | 98.0%  | 98.0%    | 98.6% | 0.6% |
|                         | cFPR <sup>†</sup>      | 5.6%   | 5.4%   | 6.4%   | 5.7%   | 5.4%   | 6.3%   | 5.3%   | 5.9%   | 5.9%   | 5.5%     | 5.7%  | 0.4% |
|                         | precision <sup>†</sup> | 94.5%  | 94.7%  | 93.9%  | 94.5%  | 94.6%  | 94.0%  | 94.8%  | 94.3%  | 94.4%  | 94.6%    | 94.4% | 0.3% |
|                         | MCC <sup>†</sup>       | 92.6%  | 93.0%  | 93.2%  | 92.4%  | 93.5%  | 93.2%  | 92.7%  | 93.6%  | 92.2%  | 92.5%    | 92.9% | 0.5% |
| VarScan2                | TPR <sup>†</sup>       | 99.6%  | 99.6%  | 99.6%  | 99.6%  | 99.6%  | 99.6%  | 99.6%  | 99.6%  | 99.6%  | 99.6%    | 99.6% | 0.0% |
|                         | cFPR <sup>†</sup>      | 60.9%  | 60.3%  | 60.4%  | 60.1%  | 59.6%  | 60.6%  | 60.0%  | 60.1%  | 62.1%  | 60.7%    | 60.5% | 0.7% |
|                         | precision <sup>†</sup> | 61.6%  | 62.3%  | 62.2%  | 62.1%  | 61.6%  | 61.9%  | 62.0%  | 62.1%  | 61.8%  | 62.0%    | 62.0% | 0.2% |
|                         | MCC <sup>†</sup>       | 48.4%  | 49.1%  | 49.1%  | 49.1%  | 49.2%  | 48.8%  | 49.2%  | 49.1%  | 47.8%  | 48.7%    | 48.9% | 0.5% |
| MuTect                  | TPR <sup>†</sup>       | 94.4%  | 94.4%  | 94.2%  | 94.2%  | 94.2%  | 94.3%  | 94.2%  | 94.3%  | 94.3%  | 94.4%    | 94.3% | 0.1% |
|                         | cFPR <sup>†</sup>      | 38.1%  | 37.9%  | 37.7%  | 37.6%  | 36.8%  | 37.9%  | 38.0%  | 38.1%  | 39.0%  | 38.2%    | 37.9% | 0.5% |
|                         | precision <sup>†</sup> | 70.8%  | 71.3%  | 71.3%  | 71.2%  | 71.1%  | 71.1%  | 70.9%  | 71.0%  | 70.9%  | 71.1%    | 71.1% | 0.2% |
|                         | MCC <sup>†</sup>       | 59.4%  | 59.7%  | 59.6%  | 59.6%  | 60.1%  | 59.5%  | 59.3%  | 59.4%  | 58.7%  | 59.4%    | 59.5% | 0.4% |

<sup>†</sup>adjusted TPR, cFPR, MCC and precision.

**Table S2B. The six thresholds of GATKcan trained by randomly sampled 44 TCGA EC tumors and performances of GATKcan in the ten training experiments.**

| Repeat                         | 1      | 2      | 3      | 4      | 5      | 6      | 7      | 8      | 9      | 10     |       |
|--------------------------------|--------|--------|--------|--------|--------|--------|--------|--------|--------|--------|-------|
| $\alpha$                       | 0.5    | 0.5    | 0.5    | 0.3    | 0.3    | 0.4    | 0.4    | 0.3    | 0.5    | 0.5    |       |
| dNM                            | 991.1  | 988.1  | 990.5  | 985.6  | 984.3  | 981.5  | 989.3  | 982.3  | 987.9  | 989.1  |       |
| FS                             | 46.1   | 43.6   | 45.8   | 49.3   | 51.8   | 50.9   | 45.7   | 55.2   | 47.0   | 45.6   |       |
| MQ                             | 50     | 49.5   | 39.2   | 48.2   | 48     | 50     | 39.9   | 50     | 49.9   | 39.9   |       |
| MQRankSum                      | -7.9   | -7.9   | -10.1  | -10.1  | -10.4  | -9.6   | -9.0   | -8.4   | -10.2  | -9.6   |       |
| QD                             | 0.1    | 0.1    | 0.1    | 0.1    | 0.1    | 0.1    | 0.1    | 0.2    | 0.1    | 0.0    |       |
| Mann-Whitney test<br>(P value) | 0.0100 | 0.0100 | 0.0100 | 0.0100 | 0.0090 | 0.0100 | 0.0820 | 0.0100 | 0.0100 | 0.0100 |       |
| Training                       | TPR    | 98.58  | 98.10  | 99.29  | 98.59  | 98.88  | 98.66  | 99.30  | 99.60  | 98.22  | 99.17 |
|                                | cFPR   | 10.68  | 10.65  | 14.32  | 12.24  | 11.58  | 10.76  | 13.99  | 11.91  | 10.54  | 14.29 |

**Table S2C. The four thresholds of GATKcan trained by ~18% of 539 reported indels and 112 non-indels (from 241 TCGA EC tumors), and performances of GATKcan in the ten training experiments.**

| Repeat                         | 1      | 2      | 3      | 4      | 5      | 6      | 7      | 8      | 9      | 10     |        |
|--------------------------------|--------|--------|--------|--------|--------|--------|--------|--------|--------|--------|--------|
| $\alpha$                       | 0.5    | 0.5    | 0.3    | 0.5    | 0.5    | 0.6    | 0.3    | 0.3    | 0.5    | 0.5    |        |
| dNM                            | 753.4  | 405.0  | 581.6  | 395.2  | 658.8  | 464.0  | 397.6  | 619.2  | 566.9  | 633.6  |        |
| FS                             | 86.3   | 133.3  | 91.6   | 136.6  | 102.7  | 121.0  | 95.1   | 99.1   | 135.7  | 139.9  |        |
| QD                             | 0.28   | 0.43   | 0.28   | 0.76   | 0.4    | 0.18   | 0.23   | 0.41   | 0.49   | 0.81   |        |
| Mann-Whitney test<br>(P value) | 0.0550 | 0.0900 | 0.0550 | 0.0640 | 0.0134 | 0.0370 | 0.0271 | 0.0460 | 0.1000 | 0.0033 |        |
| Training                       | TPR    | 100.00 | 100.00 | 100.00 | 100.00 | 100.00 | 100.00 | 100.00 | 100.00 | 100.00 | 100.00 |
|                                | cFPR   | 0.00   | 0.00   | 0.00   | 0.00   | 0.00   | 0.00   | 0.00   | 0.00   | 0.00   | 0.00   |

**Table S2D. The performances of the four algorithms in ten experiments, checked against the reported mutations in TCGA EC paper; GATKcan used the cutoffs trained by 44 randomly sampled EC tumors in each repeat.**

| Repeat                  | 1                      | 2      | 3      | 4      | 5      | 6      | 7      | 8      | 9      | 10     | Mean     | SE    |      |
|-------------------------|------------------------|--------|--------|--------|--------|--------|--------|--------|--------|--------|----------|-------|------|
| No. of called variants  | 52,129                 | 52,672 | 51,805 | 50,206 | 53,059 | 52,100 | 52,265 | 52,713 | 52,972 | 52,984 | 52,290.5 | 850.1 |      |
| No. of somatic variants | 1,337                  | 1,825  | 1,933  | 1,581  | 1,893  | 1,795  | 1,904  | 1,364  | 1,861  | 1,915  | 1,740.8  | 229.0 |      |
| GATK                    | TPR                    | 86.7%  | 87.3%  | 90.3%  | 86.6%  | 88.4%  | 87.8%  | 89.4%  | 87.2%  | 88.0%  | 89.7%    | 88.1% | 1.3% |
|                         | cFPR                   | 64.8%  | 65.3%  | 65.2%  | 64.3%  | 65.3%  | 64.8%  | 65.5%  | 64.7%  | 65.1%  | 65.4%    | 65.0% | 0.4% |
|                         | precision              | 12.2%  | 12.7%  | 13.0%  | 10.4%  | 13.5%  | 12.4%  | 12.9%  | 12.6%  | 12.9%  | 13.6%    | 12.6% | 0.9% |
|                         | MCC                    | 13.6%  | 14.0%  | 15.9%  | 12.7%  | 15.1%  | 14.3%  | 15.2%  | 14.1%  | 14.6%  | 15.8%    | 14.5% | 1.0% |
|                         | TPR <sup>†</sup>       | 98.3%  | 99.0%  | 99.0%  | 98.8%  | 98.9%  | 99.1%  | 99.0%  | 98.3%  | 99.2%  | 98.8%    | 98.8% | 0.3% |
|                         | cFPR <sup>†</sup>      | 75.5%  | 81.8%  | 81.7%  | 79.6%  | 80.1%  | 80.9%  | 81.9%  | 77.0%  | 80.9%  | 82.9%    | 80.2% | 2.3% |
|                         | precision <sup>†</sup> | 54.2%  | 54.9%  | 55.9%  | 54.2%  | 56.3%  | 54.6%  | 54.9%  | 54.5%  | 55.2%  | 55.3%    | 55.0% | 0.7% |
| MCC <sup>†</sup>        | 33.1%                  | 29.3%  | 29.6%  | 30.7%  | 30.8%  | 30.2%  | 29.1%  | 32.1%  | 30.7%  | 27.7%  | 30.3%    | 1.5%  |      |
| GATKcan                 | TPR                    | 94.1%  | 95.1%  | 99.1%  | 95.3%  | 96.3%  | 94.2%  | 98.6%  | 94.2%  | 94.7%  | 99.1%    | 96.1% | 2.1% |
|                         | cFPR                   | 10.9%  | 11.8%  | 14.8%  | 11.7%  | 12.0%  | 10.9%  | 14.3%  | 10.7%  | 11.2%  | 14.7%    | 12.3% | 1.6% |
|                         | precision              | 47.2%  | 46.7%  | 41.9%  | 41.2%  | 48.2%  | 47.5%  | 42.8%  | 48.5%  | 48.2%  | 43.6%    | 45.6% | 2.9% |
|                         | MCC                    | 62.2%  | 62.0%  | 59.4%  | 58.3%  | 63.4%  | 62.4%  | 59.9%  | 63.1%  | 63.0%  | 60.6%    | 61.4% | 1.8% |
|                         | TPR <sup>†</sup>       | 97.0%  | 98.7%  | 99.5%  | 98.8%  | 98.4%  | 98.1%  | 99.6%  | 96.8%  | 98.3%  | 99.5%    | 98.5% | 1.0% |
|                         | cFPR <sup>†</sup>      | 4.4%   | 6.0%   | 7.2%   | 6.1%   | 6.3%   | 5.8%   | 6.9%   | 4.7%   | 6.4%   | 6.9%     | 6.1%  | 0.9% |
|                         | precision <sup>†</sup> | 95.2%  | 94.3%  | 93.5%  | 94.0%  | 94.3%  | 94.3%  | 93.6%  | 95.1%  | 93.9%  | 93.7%    | 94.2% | 0.6% |
| MCC <sup>†</sup>        | 92.5%                  | 92.8%  | 92.6%  | 92.8%  | 92.4%  | 92.3%  | 92.9%  | 92.1%  | 92.0%  | 92.9%  | 92.5%    | 0.3%  |      |
| VarScan2                | TPR <sup>†</sup>       | 99.5%  | 99.7%  | 99.6%  | 99.5%  | 99.6%  | 99.7%  | 99.6%  | 99.5%  | 99.7%  | 99.6%    | 99.6% | 0.1% |
|                         | cFPR <sup>†</sup>      | 50.8%  | 62.2%  | 60.9%  | 57.2%  | 63.8%  | 61.3%  | 62.4%  | 52.7%  | 61.7%  | 63.0%    | 59.6% | 4.5% |
|                         | precision <sup>†</sup> | 64.0%  | 61.7%  | 63.1%  | 62.4%  | 62.0%  | 61.5%  | 61.7%  | 63.9%  | 61.9%  | 62.1%    | 62.4% | 0.9% |
|                         | MCC <sup>†</sup>       | 55.5%  | 47.7%  | 49.0%  | 50.9%  | 46.6%  | 48.3%  | 47.4%  | 54.3%  | 48.2%  | 47.3%    | 49.5% | 3.1% |
| MuTect                  | TPR <sup>†</sup>       | 92.6%  | 94.6%  | 94.1%  | 95.3%  | 93.9%  | 94.4%  | 94.7%  | 92.3%  | 94.7%  | 94.2%    | 94.1% | 0.9% |
|                         | cFPR <sup>†</sup>      | 26.5%  | 39.6%  | 39.5%  | 34.1%  | 40.5%  | 38.9%  | 39.9%  | 28.6%  | 39.0%  | 41.1%    | 36.8% | 5.2% |
|                         | precision <sup>†</sup> | 76.0%  | 70.6%  | 71.4%  | 72.7%  | 70.8%  | 70.4%  | 70.5%  | 75.2%  | 70.9%  | 70.4%    | 71.9% | 2.1% |
|                         | MCC <sup>†</sup>       | 66.9%  | 58.7%  | 58.3%  | 63.8%  | 57.1%  | 58.8%  | 58.4%  | 64.8%  | 59.3%  | 56.9%    | 60.3% | 3.5% |

<sup>†</sup>adjusted TPR, cFPR, MCC and precision.

**Table S3. The performances of GATKcan in ten repeats, checked against the reported mutations in TCGA BC paper. In each repeat, only the set of trained cutoffs were different; no indels was in the called variants of BC .**

| The kth set of Cutoffs                  | 1          | 2     | 3     | 4      | 5     | 6     | 7      | 8      | 9      | 10    | Mean   | SE           |             |
|-----------------------------------------|------------|-------|-------|--------|-------|-------|--------|--------|--------|-------|--------|--------------|-------------|
| GATKcan<br>(trained by 10<br>EC tumors) | TPR        | 70.6% | 70.6% | 70.9%  | 70.6% | 70.7% | 70.8%  | 70.6%  | 70.8%  | 70.0% | 70.6%  | <b>70.6%</b> | <b>0.2%</b> |
|                                         | cFPR       | 3.2%  | 3.0%  | 3.4%   | 3.1%  | 3.5%  | 3.4%   | 3.2%   | 3.4%   | 3.1%  | 3.2%   | <b>3.3%</b>  | <b>0.2%</b> |
|                                         | precision  | 44.9% | 46.4% | 43.2%  | 45.2% | 42.6% | 43.0%  | 44.3%  | 43.5%  | 45.0% | 44.6%  | <b>44.3%</b> | <b>1.2%</b> |
|                                         | MCC        | 54.4% | 55.3% | 53.3%  | 54.5% | 52.8% | 53.2%  | 54.0%  | 53.5%  | 54.2% | 54.1%  | <b>53.9%</b> | <b>0.7%</b> |
|                                         | TPR†       | 99.3% | 99.3% | 100.0% | 99.3% | 99.3% | 100.0% | 99.3%  | 100.0% | 99.3% | 99.3%  | <b>99.5%</b> | <b>0.3%</b> |
|                                         | cFPR†      | 2.3%  | 2.3%  | 5.1%   | 2.9%  | 3.9%  | 3.5%   | 2.3%   | 3.2%   | 3.9%  | 2.3%   | <b>3.2%</b>  | <b>0.9%</b> |
|                                         | precision† | 95.4% | 95.4% | 90.2%  | 94.2% | 92.4% | 93.0%  | 95.4%  | 93.6%  | 92.4% | 95.4%  | <b>93.7%</b> | <b>1.8%</b> |
|                                         | MCC†       | 96.1% | 96.1% | 92.5%  | 95.1% | 93.8% | 94.7%  | 96.1%  | 95.2%  | 93.8% | 96.1%  | <b>95.0%</b> | <b>1.3%</b> |
| GATKcan<br>(trained by 44<br>EC tumors) | TPR        | 70.6% | 70.6% | 70.9%  | 70.6% | 70.6% | 70.6%  | 70.9%  | 70.6%  | 70.6% | 70.9%  | <b>70.7%</b> | <b>0.1%</b> |
|                                         | cFPR       | 3.2%  | 3.2%  | 3.8%   | 3.3%  | 3.4%  | 3.2%   | 3.4%   | 3.2%   | 3.2%  | 3.8%   | <b>3.4%</b>  | <b>0.2%</b> |
|                                         | precision  | 44.6% | 44.4% | 40.5%  | 43.8% | 43.4% | 44.5%  | 43.2%  | 44.5%  | 44.4% | 40.6%  | <b>43.4%</b> | <b>1.6%</b> |
|                                         | MCC        | 54.1% | 54.0% | 51.4%  | 53.6% | 53.4% | 54.1%  | 53.3%  | 54.1%  | 54.0% | 51.5%  | <b>53.4%</b> | <b>1.0%</b> |
|                                         | TPR†       | 99.3% | 99.3% | 100.0% | 99.3% | 99.3% | 99.3%  | 100.0% | 99.3%  | 99.3% | 100.0% | <b>99.5%</b> | <b>0.3%</b> |
|                                         | cFPR†      | 4.5%  | 4.5%  | 5.1%   | 4.5%  | 4.5%  | 4.5%   | 5.1%   | 4.5%   | 4.5%  | 5.1%   | <b>4.7%</b>  | <b>0.3%</b> |
|                                         | precision† | 91.3% | 91.3% | 90.2%  | 91.3% | 91.3% | 91.3%  | 90.2%  | 91.3%  | 91.3% | 90.2%  | <b>91.0%</b> | <b>0.5%</b> |
|                                         | MCC†       | 92.8% | 92.8% | 92.5%  | 92.8% | 92.8% | 92.8%  | 92.5%  | 92.8%  | 92.8% | 92.5%  | <b>92.7%</b> | <b>0.1%</b> |

† adjusted TPR, cFPR, MCC and precision.

**Table S4. The performances of GATKcan in tenrepeats, checked against the reported mutations in TCGA OC paper. In each repeat, only the trained cutoffs were different.**

| The kth set of Cutoffs                                        | 1                      | 2     | 3     | 4     | 5     | 6     | 7     | 8     | 9     | 10    | Mean  | SE           |             |
|---------------------------------------------------------------|------------------------|-------|-------|-------|-------|-------|-------|-------|-------|-------|-------|--------------|-------------|
| GATKcan<br>(trained by 10<br>EC tumors<br>and ~9%<br>indels)  | TPR                    | 90.0% | 87.8% | 87.8% | 90.0% | 90.0% | 87.8% | 90.0% | 87.8% | 89.8% | 90.0% | <b>89.1%</b> | <b>1.1%</b> |
|                                                               | cFPR                   | 4.7%  | 5.0%  | 5.0%  | 4.8%  | 5.5%  | 5.2%  | 4.6%  | 5.1%  | 4.8%  | 4.9%  | <b>5.0%</b>  | <b>0.3%</b> |
|                                                               | precision              | 31.7% | 30.1% | 30.2% | 31.2% | 28.6% | 29.3% | 32.1% | 29.6% | 31.5% | 31.0% | <b>30.5%</b> | <b>1.1%</b> |
|                                                               | MCC                    | 51.7% | 49.7% | 49.8% | 51.3% | 48.9% | 48.9% | 52.1% | 49.2% | 51.5% | 51.1% | <b>50.4%</b> | <b>1.2%</b> |
|                                                               | TPR <sup>†</sup>       | 98.2% | 98.2% | 98.2% | 98.2% | 98.2% | 98.2% | 98.2% | 98.2% | 98.2% | 98.2% | <b>98.2%</b> | <b>0.0%</b> |
|                                                               | cFPR <sup>†</sup>      | 3.3%  | 3.3%  | 4.9%  | 3.3%  | 6.6%  | 4.9%  | 3.3%  | 4.9%  | 3.3%  | 3.3%  | <b>4.1%</b>  | <b>1.2%</b> |
|                                                               | precision <sup>†</sup> | 93.2% | 93.2% | 90.2% | 93.2% | 87.3% | 90.2% | 93.2% | 90.2% | 93.2% | 93.2% | <b>91.7%</b> | <b>2.1%</b> |
|                                                               | MCC <sup>†</sup>       | 93.6% | 93.6% | 91.3% | 93.6% | 89.0% | 91.3% | 93.6% | 91.3% | 93.6% | 93.6% | <b>92.5%</b> | <b>1.6%</b> |
| GATKcan<br>(trained by 44<br>EC tumors<br>and ~18%<br>indels) | TPR                    | 90.0% | 90.0% | 90.0% | 90.0% | 90.0% | 90.0% | 87.8% | 90.0% | 90.0% | 90.0% | <b>89.8%</b> | <b>0.7%</b> |
|                                                               | cFPR                   | 4.6%  | 5.2%  | 5.1%  | 5.3%  | 4.9%  | 5.2%  | 5.5%  | 4.8%  | 4.9%  | 5.6%  | <b>5.1%</b>  | <b>0.3%</b> |
|                                                               | precision              | 32.5% | 29.6% | 30.0% | 29.4% | 31.0% | 29.7% | 28.0% | 31.5% | 31.0% | 28.2% | <b>30.1%</b> | <b>1.4%</b> |
|                                                               | MCC                    | 52.5% | 49.9% | 50.2% | 49.6% | 51.2% | 49.9% | 47.7% | 51.6% | 51.1% | 48.5% | <b>50.2%</b> | <b>1.4%</b> |
|                                                               | TPR <sup>†</sup>       | 98.2% | 98.2% | 98.2% | 98.2% | 98.2% | 98.2% | 98.2% | 98.2% | 98.2% | 98.2% | <b>98.2%</b> | <b>0.0%</b> |
|                                                               | cFPR <sup>†</sup>      | 3.3%  | 3.3%  | 4.9%  | 4.1%  | 4.1%  | 3.3%  | 4.9%  | 3.3%  | 3.3%  | 4.9%  | <b>3.9%</b>  | <b>0.7%</b> |
|                                                               | precision <sup>†</sup> | 93.2% | 93.2% | 90.2% | 91.7% | 91.7% | 93.2% | 90.2% | 93.2% | 93.2% | 90.2% | <b>92.0%</b> | <b>1.4%</b> |
|                                                               | MCC <sup>†</sup>       | 93.6% | 93.6% | 91.3% | 92.5% | 92.5% | 93.6% | 91.3% | 93.6% | 93.6% | 91.3% | <b>92.7%</b> | <b>1.1%</b> |

<sup>†</sup>adjusted TPR, cFPR, MCC and precision.

**Table S5. The performances of GATKcan in ten repeats, checked against the reported mutations in TCGA cutaneous melanoma paper. In each repeat, only the set of trained cutoffs were different; no indels was in the called variants of Melanoma.**

| The kth set of Cutoffs                  | 1          | 2     | 3     | 4     | 5     | 6     | 7     | 8     | 9     | 10    | Mean  | SE           |             |
|-----------------------------------------|------------|-------|-------|-------|-------|-------|-------|-------|-------|-------|-------|--------------|-------------|
| GATKcan<br>(trained by 10<br>EC tumors) | TPR        | 98.7% | 97.9% | 99.1% | 98.6% | 98.9% | 99.1% | 98.6% | 99.1% | 98.2% | 98.6% | <b>98.7%</b> | <b>0.4%</b> |
|                                         | cFPR       | 4.6%  | 3.9%  | 4.1%  | 4.6%  | 4.7%  | 4.1%  | 4.6%  | 4.0%  | 4.7%  | 4.6%  | <b>4.4%</b>  | <b>0.3%</b> |
|                                         | precision  | 85.3% | 87.2% | 86.8% | 85.2% | 85.1% | 86.8% | 85.3% | 87.0% | 85.2% | 85.3% | <b>85.9%</b> | <b>0.9%</b> |
|                                         | MCC        | 89.4% | 90.2% | 90.7% | 89.2% | 89.4% | 90.7% | 89.3% | 90.8% | 89.0% | 89.3% | <b>89.8%</b> | <b>0.7%</b> |
|                                         | TPR†       | 99.0% | 99.1% | 99.6% | 98.9% | 99.2% | 99.6% | 99.0% | 99.4% | 98.9% | 99.0% | <b>99.2%</b> | <b>0.3%</b> |
|                                         | cFPR†      | 8.4%  | 8.4%  | 10.3% | 7.7%  | 9.3%  | 10.3% | 7.7%  | 10.3% | 7.7%  | 7.7%  | <b>8.8%</b>  | <b>1.2%</b> |
|                                         | precision† | 97.4% | 97.4% | 96.8% | 97.6% | 97.1% | 96.8% | 97.6% | 96.8% | 97.6% | 97.6% | <b>97.3%</b> | <b>0.4%</b> |
|                                         | MCC†       | 92.4% | 92.5% | 92.2% | 92.6% | 92.1% | 92.4% | 92.7% | 91.9% | 92.6% | 92.7% | <b>92.4%</b> | <b>0.3%</b> |
| GATKcan<br>(trained by 44<br>EC tumors) | TPR        | 98.6% | 98.7% | 99.3% | 98.9% | 98.9% | 98.6% | 99.1% | 98.6% | 98.6% | 99.3% | <b>98.9%</b> | <b>0.3%</b> |
|                                         | cFPR       | 4.7%  | 4.7%  | 4.8%  | 4.7%  | 4.7%  | 4.7%  | 4.1%  | 4.7%  | 4.7%  | 4.8%  | <b>4.7%</b>  | <b>0.2%</b> |
|                                         | precision  | 85.2% | 85.2% | 84.9% | 85.1% | 85.1% | 85.2% | 86.9% | 85.2% | 85.2% | 84.9% | <b>85.3%</b> | <b>0.6%</b> |
|                                         | MCC        | 89.3% | 89.3% | 89.5% | 89.3% | 89.3% | 89.2% | 90.8% | 89.2% | 89.3% | 89.5% | <b>89.5%</b> | <b>0.5%</b> |
|                                         | TPR†       | 99.0% | 99.1% | 99.6% | 99.2% | 99.2% | 99.0% | 99.6% | 99.0% | 99.0% | 99.6% | <b>99.2%</b> | <b>0.3%</b> |
|                                         | cFPR†      | 7.7%  | 8.2%  | 10.3% | 8.6%  | 8.6%  | 7.7%  | 10.3% | 7.9%  | 7.7%  | 10.3% | <b>8.7%</b>  | <b>1.1%</b> |
|                                         | precision† | 97.6% | 97.5% | 96.8% | 97.3% | 97.3% | 97.6% | 96.8% | 97.5% | 97.6% | 96.8% | <b>97.3%</b> | <b>0.3%</b> |
|                                         | MCC†       | 92.7% | 92.7% | 92.4% | 92.5% | 92.5% | 92.7% | 92.2% | 92.5% | 92.7% | 92.2% | <b>92.5%</b> | <b>0.2%</b> |

†adjusted TPR, cFPR, MCC and precision.



**Table S6. False positive rate (in Mb<sup>-1</sup>) of GATK and GATKcan in detecting mutations of randomly sampled 10% reference sites of cancer genes in four cancers; GATKcan used the first set of trained cutoffs by ten EC tumors.**

| Cancer   | No. of samples | Reference sites (Mb) | FPR (Mb <sup>-1</sup> ) |         |
|----------|----------------|----------------------|-------------------------|---------|
|          |                |                      | GATK                    | GATKcan |
| EC       | 241            | 60.4                 | 313                     | 189     |
| BC       | 503            | 84.9                 | 184                     | 94      |
| OC       | 215            | 29.7                 | 126                     | 85      |
| Melanoma | 342            | 46.9                 | 101                     | 64      |

**Note1****The settings of the parameters in PSO**

The upper/lower bound and step size for each statistic

| Statistics                   | Exome-seq   |             | Step size |
|------------------------------|-------------|-------------|-----------|
|                              | Lower bound | Upper bound |           |
| dNB                          | 0           | 1000        | 1         |
| FS                           | 0           | 60          | 1         |
| MQ                           | 30          | 50          | 1         |
| MQRankSum                    | -12.5       | -2.5        | 0.1       |
| QD                           | 0           | 2           | 0.1       |
| p-value of Mann-Whitney test | $10^{-1}$   | $10^{-6}$   | $10^{-1}$ |

The number of seed points = 4100

The number of generations = 500

Fitness function =  $\alpha * (1 - \text{FPR}) + (1 - \alpha) * (\text{TPR})$

**The collected reported mutations in 19 TCGA cancer types (by Jan., 2017), where the cancer types are tabulated as follows.**

| TCGA project | Cancer type                                  |
|--------------|----------------------------------------------|
| ACC          | Adrenocortical carcinoma                     |
| BLCA         | Bladder Urothelial Carcinoma                 |
| BRCA         | Breast invasive carcinoma                    |
| COAD&READ    | Colon adenocarcinoma & Rectum adenocarcinoma |
| GBM          | Glioblastoma multiforme                      |
| HNSC         | Head and Neck squamous cell carcinoma        |
| KICH         | Kidney Chromophobe                           |
| KIRC         | Kidney renal clear cell carcinoma            |
| KIRP         | Kidney renal papillary cell carcinoma        |
| LAML         | Acute Myeloid Leukemia                       |
| LGG          | Brain Lower Grade Glioma                     |
| LUAD         | Lung adenocarcinoma                          |
| LUSC         | Lung squamous cell carcinoma                 |
| OV           | Ovarian serous cystadenocarcinoma            |

|      |                                      |
|------|--------------------------------------|
| PRAD | Prostate adenocarcinoma              |
| SKCM | Skin Cutaneous Melanoma              |
| STAD | Stomach adenocarcinoma               |
| THCA | Thyroid carcinoma                    |
| UCEC | Uterine Corpus Endometrial Carcinoma |
